# Supplementary material
Source: MDPI journal article supplement (https://www.mdpi.com/2072-4292/9/11/1096)
Supplement: s1 [file s1]

**Table S2.** The list of all candidate models for the subset regression analysis between ASU and the number of acoustic morphospecies for the three taxonomic groups.

| <b>Model Variables</b>       | <b>Residual SS</b> | <b>Akaike weight</b> | <b>Delta AICc</b> | <b>Adjust R<sup>2</sup></b> |
|------------------------------|--------------------|----------------------|-------------------|-----------------------------|
| Intercept only               | 476.4              | 0.021                | 7.55              | 0.00                        |
| Insects                      | 92.0               | 0.925                | 0.00              | 0.77                        |
| Birds                        | 223.7              | 0.026                | 7.10              | 0.45                        |
| Anurans                      | 389.6              | 0.002                | 11.54             | 0.04                        |
| Insects + Anurans            | 82.3               | 0.013                | 8.44              | 0.75                        |
| Insects + Birds              | 90.0               | 0.009                | 9.16              | 0.73                        |
| Birds + Anurans              | 179.0              | 0.000                | 14.66             | 0.47                        |
| Insects + Birds +<br>Anurans | 82.1               | 0.000                | 27.09             | 0.69                        |
